# Supplementary material for: Amplified fluorescence detection of T4 polynucleotide kinase activity and inhibition via a coupled λ exonuclease reaction and exonuclease III-aided trigger DNA recycling
Source: Royal Society of Chemistry journal article supplement (doi:10.1039/c4ay01097c), 2014-06-05
Supplement: c4ay01097c1.pdf [file c4ay01097c1.pdf]

## **Electronic Supplementary Information (ESI)**

### **Amplified Fluorescence Detection of T4 Polynucleotide Kinase Activity and Inhibition via Coupled $\lambda$ Exonuclease Reaction and Exonuclease III-aided Trigger DNA Recycling**

**Zi-Mao Zhu, Ru-Qin Yu, Xia Chu\***

State Key Laboratory of Chemo/Biosensing and Chemometrics, College of Chemistry and Chemical Engineering, Hunan University, Changsha, 410082, P. R. China

\*To whom correspondence should be addressed.

Tel: +86-731-88821916.

Fax: +86-731-88821916.

E-mail address: xiachu@hnu.edu.cn

**Table S1.** Oligonucleotide sequences used in this work

| Name      | Sequences                                   |
|-----------|---------------------------------------------|
| tDNA      | 5'-C3-GGCTCTGACAACAAGATTACTAGTAGCTTTT-3'    |
| cDNA      | 5'-GCTACTAGTAATCTTGTTGTCAGAGCCTTTT-3'       |
| P1-FAM    | 5'-(FAM)-GACAACAAGATTACTAGTAGCTTTT-3'       |
| P2-Dabcyl | 5'-GCTACTAGTAATCTTGTTGT-(Dabcyl)-CAGAGCC-3' |

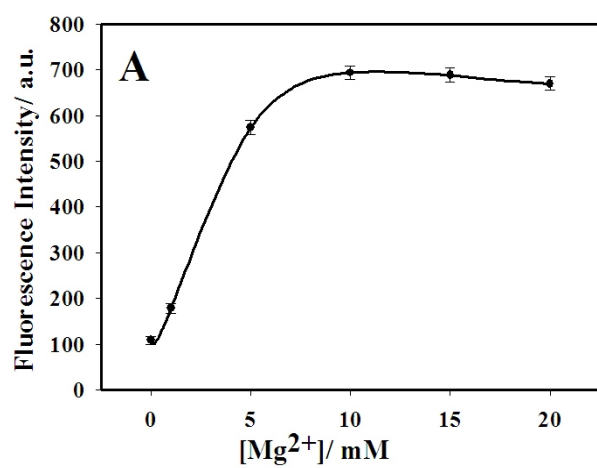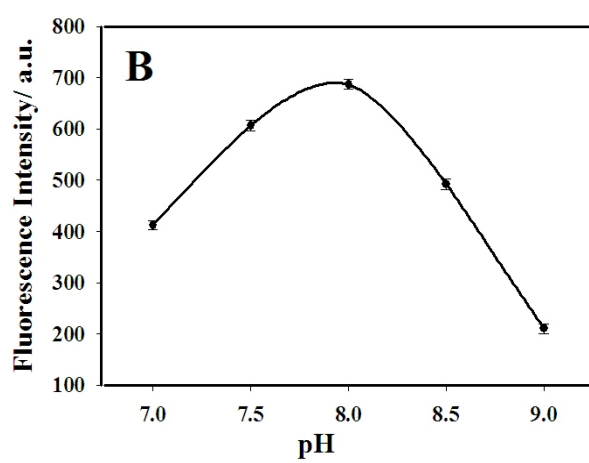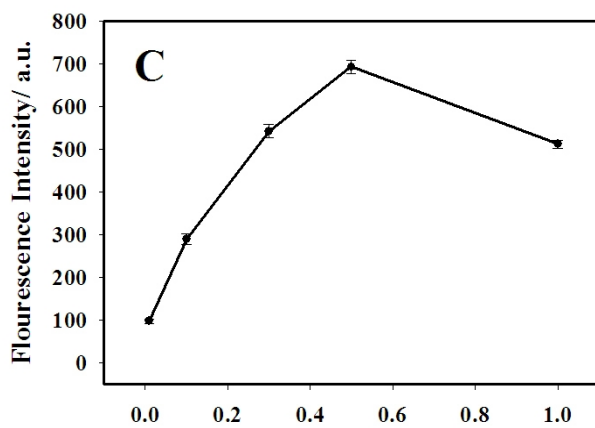

**Fig. S1.** Optimization of Mg<sup>2+</sup> concentration (A), pH (B) and Exo III concentration (C). The concentrations of PNK, ATP and λ Exo were 5 U mL<sup>-1</sup>, 1 mM and 10 units, respectively.

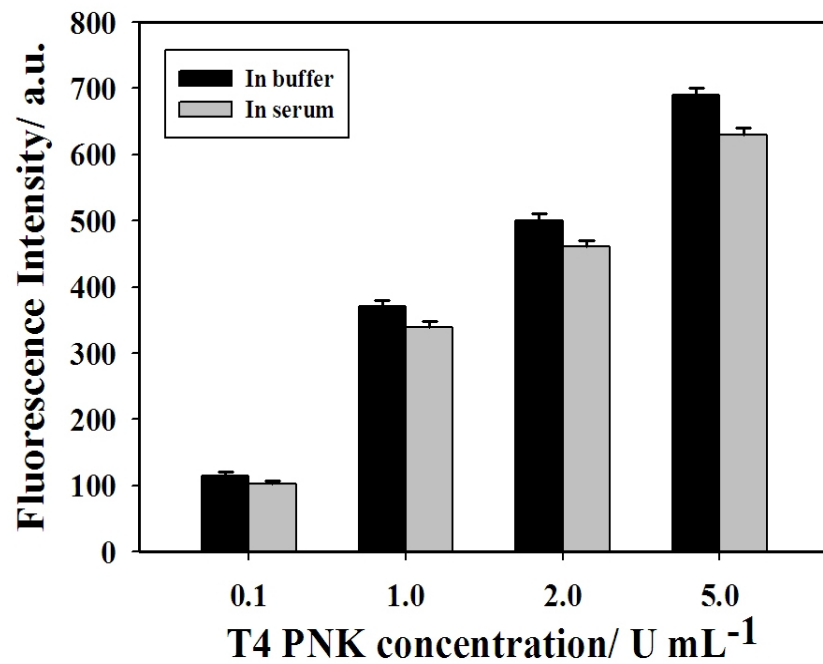

**Fig. S2.** Fluorescence intensity for the fabricated sensing system in buffer and human serum samples spiked with different concentration of T4 PNK. Human serum was diluted in 1:20 with reaction buffer. The error bars represent the standard deviation of three measurements.

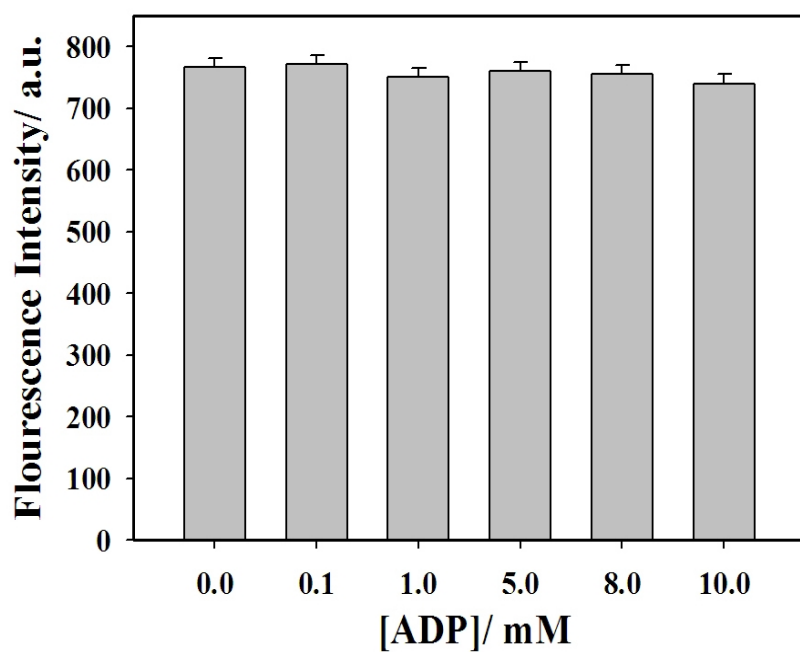

**Fig. S3.** Influence of inhibitor on Exo III activity. The assays were carried out with different concentrations of ADP in the reaction buffer.

**Table S2.** Comparison of detection limit for T4 PNK activity based on different methods

| Method              | Detection limit         | Strategy                                                 | Ref.      |
|---------------------|-------------------------|----------------------------------------------------------|-----------|
| Fluorescence        | 0.04 U mL <sup>-1</sup> | Smart probe and $\lambda$ exonuclease cleavage           | 1         |
| Fluorescence        | 0.05 U mL <sup>-1</sup> | $\lambda$ exonuclease reaction and graphene oxide        | 2         |
| Fluorescence        | 0.49 U mL <sup>-1</sup> | Copper nanoparticles and $\lambda$ exonucleas cleavage   | 3         |
| Colorimetry         | 0.06 U mL <sup>-1</sup> | HRPzyme and $\lambda$ exonuclease cleavage               | 4         |
| Electrochemistry    | 0.01 U mL <sup>-1</sup> | Titanium ion and SWCNTs                                  | 5         |
| Current measurement | 0.01 U mL <sup>-1</sup> | Nanochannel and $\lambda$ exonuclease cleavage           | 6         |
| Fluorescence        | 0.01 U mL <sup>-1</sup> | $\lambda$ exonuclease reaction and Exo III amplification | This work |

### References

1. C. Song and M. P. Zhao, 2009. *Anal. Chem.*, 81 (4), 1383-1388.
2. L. Lin, Y. Liu, X. Zhao and J. H. Li, 2011. *Anal. Chem.*, 83 (22), 8396-8402.
3. L. L. Zhang, J. J. Zhao, H. Zhang, J. H. Jiang and R. Q. Yu, 2013. *Biosens. Bioelectron.*, 44,6-9.
4. C. Jiang, C. Y. Yan, J. H. Jiang and R. Q. Yu, 2013. *Anal. Chem. Acta.*, 766, 88-93.
5. Y. H. Wang, X. X. He, K. M. Wang, X. Q. Ni, J. Su and Z. F. Chen, *Biosens. Bioelectron.*, 2012, 32, 213-218.
6. L. Lin, Y. Liu, J. Yan, X. S. Wang and J. H. Li, *Anal. Chem.*, 2013, 85, 334-340.
